# Supplementary material for: Nitrogen Fixation in Subtropical Seagrass Sediments: Seasonal Patterns in Activity in Santa Rosa Sound, Florida, USA
Source: MDPI journal article supplement (doi:10.3390/jmse9070766), 2021-07-14
Supplement: s1 [file s1]

## Supplementary Materials

**Table S1**

Spearman correlation coefficients and significance levels for the following correlations between the various environmental and biogeochemical parameters for the three substrate types.

| Substrate Type       | Variables                                                           | Spearman Correlation Coefficient ( <i>r</i> ) | Significance Level ( <i>p</i> ) |
|----------------------|---------------------------------------------------------------------|-----------------------------------------------|---------------------------------|
| <i>T. testudinum</i> | Porewater NH <sub>4</sub> <sup>+</sup> ~ Porewater H <sub>2</sub> S | +0.69                                         | 0.01                            |
| <i>T. testudinum</i> | Seagrass Areal Cover ~ Porewater H <sub>2</sub> S                   | +0.70                                         | 0.01                            |
| <i>T. testudinum</i> | Surface Irradiance ~ Porewater H <sub>2</sub> S                     | +0.67                                         | 0.01                            |
| <i>T. testudinum</i> | Temperature ~ Porewater H <sub>2</sub> S                            | +0.67                                         | 0.01                            |
| <i>T. testudinum</i> | Salinity ~ Porewater H <sub>2</sub> S                               | +0.50                                         | 0.10                            |
| <i>T. testudinum</i> | Dissolved Oxygen ~ Porewater H <sub>2</sub> S                       | -0.53                                         | 0.05                            |
| <i>T. testudinum</i> | Surface Irradiance ~ Nitrogen Fixation                              | -0.50                                         | 0.10                            |
| <i>T. testudinum</i> | Temperature ~ Nitrogen Fixation                                     | -0.61                                         | 0.05                            |
| <i>T. testudinum</i> | Dissolved Oxygen ~ Nitrogen Fixation                                | +0.53                                         | 0.10                            |
| <i>H. wrightii</i>   | Surface Irradiance ~ Porewater H <sub>2</sub> S                     | +0.51                                         | 0.10                            |
| <i>H. wrightii</i>   | Temperature ~ Porewater H <sub>2</sub> S                            | +0.49                                         | 0.10                            |
| <i>H. wrightii</i>   | Seagrass Areal Cover ~ Porewater H <sub>2</sub> S                   | +0.54                                         | 0.05                            |
| <i>H. wrightii</i>   | Porewater N:P ~ Nitrogen Fixation                                   | -0.54                                         | 0.10                            |
| Unvegetated          | Porewater NH <sub>4</sub> <sup>+</sup> ~ Porewater H <sub>2</sub> S | +0.87                                         | 0.01                            |
| Unvegetated          | Porewater DIP ~ Porewater H <sub>2</sub> S                          | +0.89                                         | 0.01                            |
| Unvegetated          | Porewater H <sub>2</sub> S ~ Nitrogen Fixation                      | +0.54                                         | 0.10                            |
| Unvegetated          | Surface Irradiance ~ Nitrogen Fixation                              | +0.48                                         | 0.10                            |
| Unvegetated          | Salinity ~ Nitrogen Fixation                                        | +0.50                                         | 0.10                            |

**Table S2**

Eigenvalues for principal components calculated by R for the PCA biplot found in Figure 7, the percent variation explained by each principal component, and the total cumulative percent variation explained by eigenvectors.

| Principal Component | Eigenvalues | Percent Variation | Cumulative Percent Variation |
|---------------------|-------------|-------------------|------------------------------|
| 1                   | 4.64        | 27.3              | 27.3                         |
| 2                   | 3.60        | 21.2              | 48.5                         |
| 3                   | 2.12        | 12.5              | 61.0                         |
| 4                   | 1.71        | 10.1              | 71.0                         |
| 5                   | 1.14        | 6.72              | 77.7                         |

**Table S3**

Contributions of each variable represented in Figure 7 to PC1 and PC2.

| Variable                                                       | Principal Component 1 | Principal Component 2 |
|----------------------------------------------------------------|-----------------------|-----------------------|
| Porewater N:P                                                  | 0.279                 | -0.286                |
| Dissolved Oxygen (mg L <sup>-1</sup> )                         | 0.228                 | 0.274                 |
| Chlorophyll <i>a</i> (µg L <sup>-1</sup> )                     | 0.018                 | -0.068                |
| Porewater NH <sub>4</sub> <sup>+</sup> (µM)                    | 0.018                 | -0.351                |
| Water Column DIP (µM)                                          | 0.011                 | 0.017                 |
| pH                                                             | -0.006                | 0.025                 |
| Water Column NO <sub>3</sub> +NO <sub>2</sub> (µM)             | -0.010                | 0.019                 |
| Nitrogen Fixation Rate (mg N m <sup>-2</sup> d <sup>-1</sup> ) | -0.063                | 0.314                 |
| Water Column NH <sub>4</sub> <sup>+</sup> (µM)                 | -0.068                | -0.172                |
| Surface Irradiance (%)                                         | -0.261                | -0.341                |
| Salinity (PSU)                                                 | -0.281                | -0.341                |
| Temperature (°C)                                               | -0.295                | -0.379                |
| Porewater DIP (µM)                                             | -0.302                | 0.095                 |
| Percent Organic Matter (%)                                     | -0.345                | 0.306                 |
| Percent Water (%)                                              | -0.366                | 0.257                 |
| Percent Areal Cover (%)                                        | -0.372                | 0.181                 |
| Porewater H <sub>2</sub> S (µM)                                | -0.380                | -0.083                |

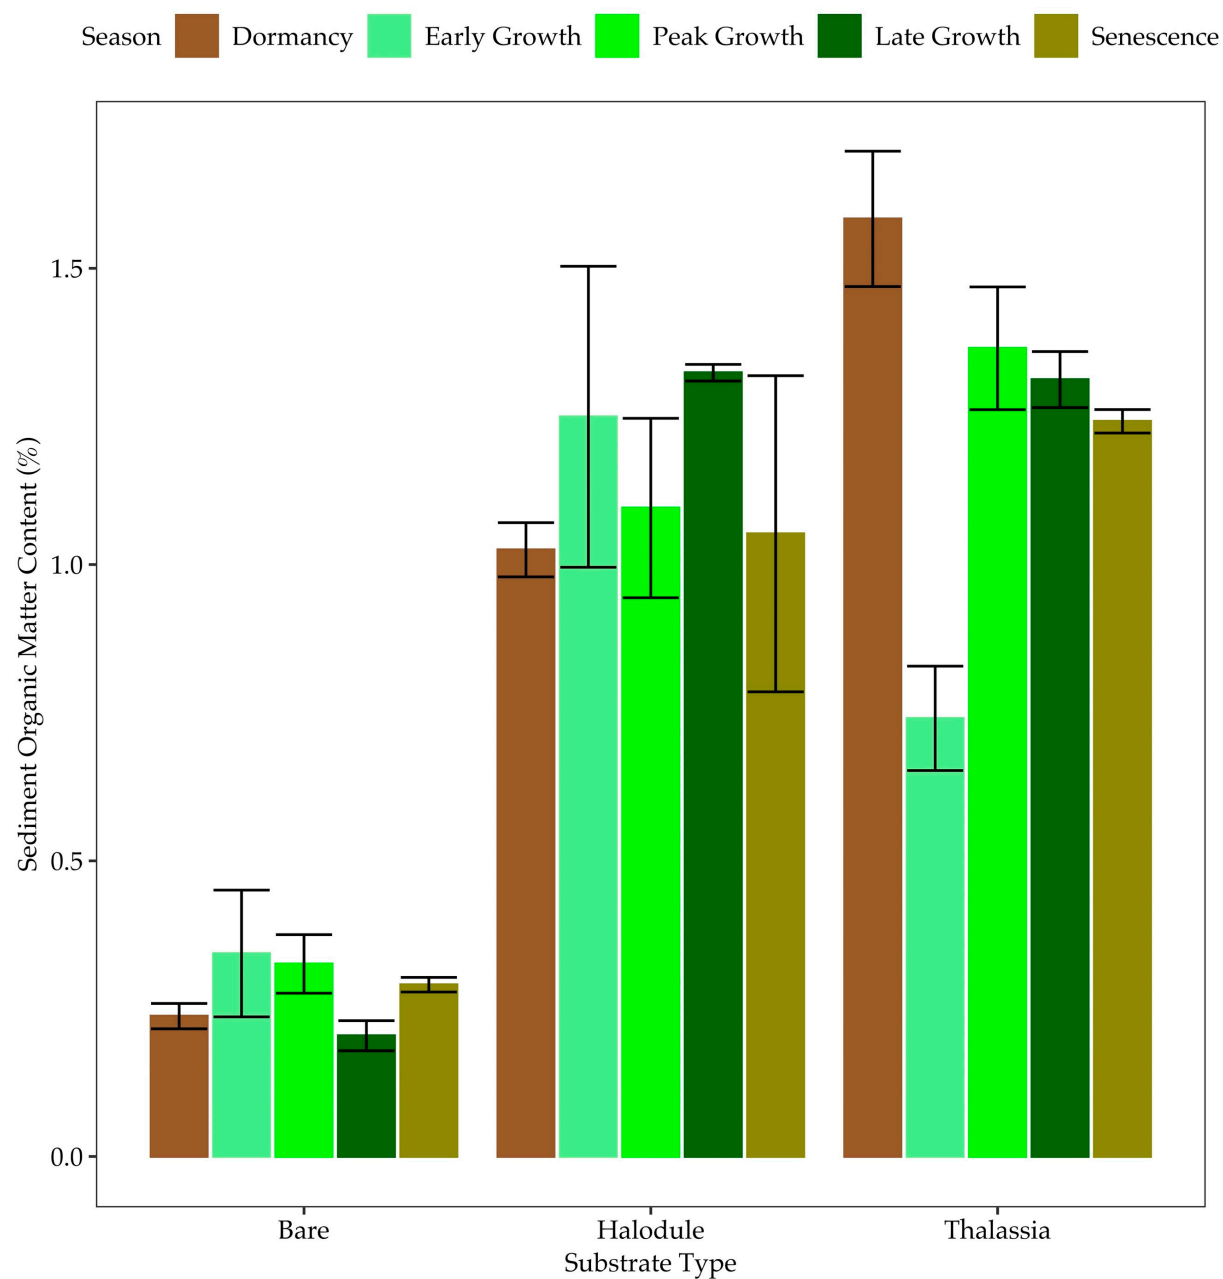

**Figure S1.** Sediment organic matter content during major periods of the seagrass growth cycle. Error bars represent the standard error of the mean.

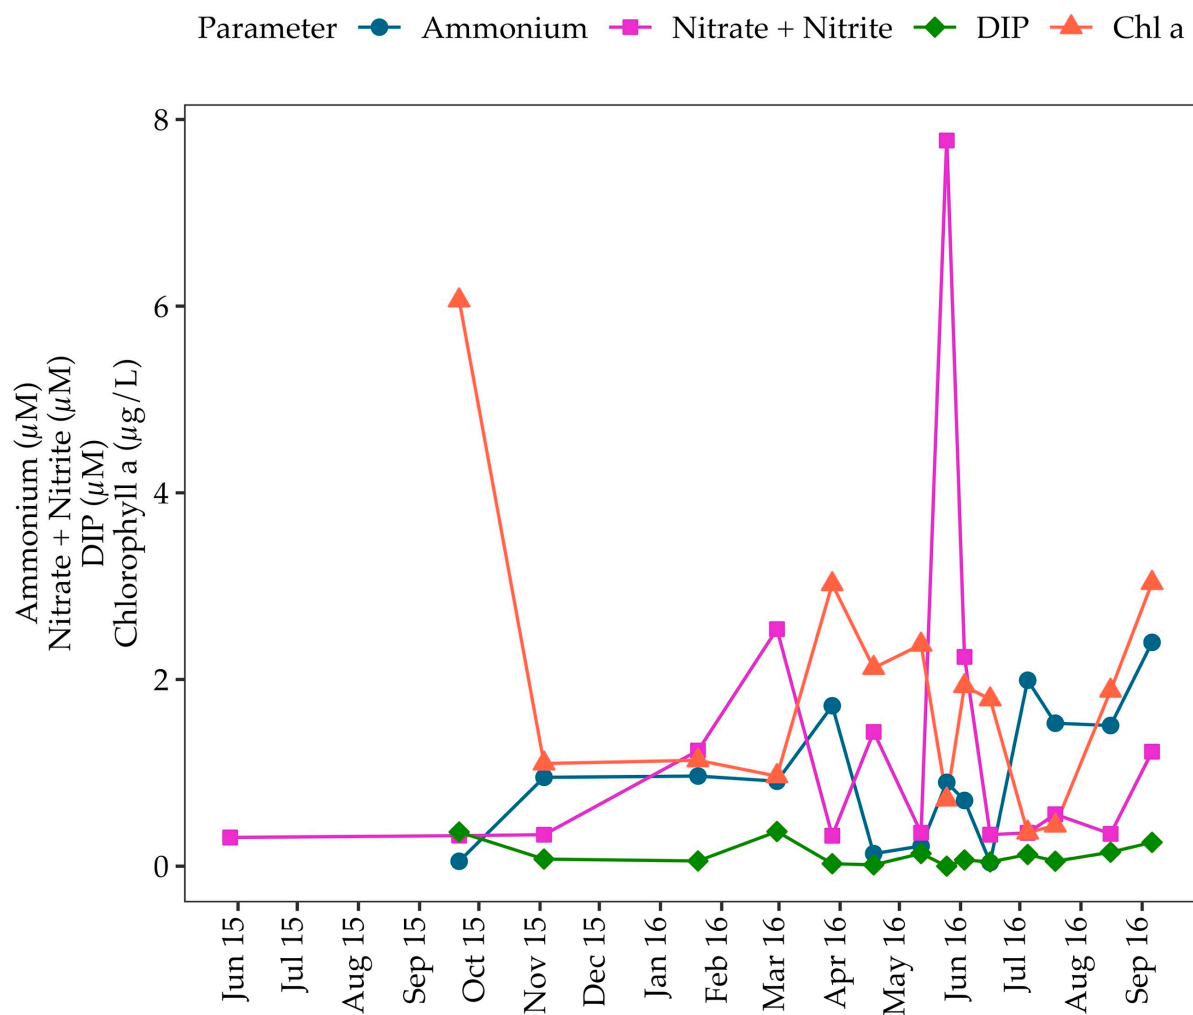

**Figure S2.** Water column chlorophyll *a* ( $\mu\text{g L}^{-1}$ ), ammonium ( $\mu\text{M}$ ), nitrate and nitrite ( $\mu\text{M}$ ) and DIP ( $\mu\text{M}$ ) concentrations from September 2015 through September 2016 at Big Sabine Point.
